# Supplementary material for: A lipidated TLR7/8 adjuvant enhances the efficacy of a vaccine against fentanyl in mice
Source: PubMed Central journal article supplement (PMC10333387; doi:10.1038/s41541-023-00694-y), 2023-07-10
Supplement: 41541_2023_694_MOESM1_ESM.pdf [file 41541_2023_694_MOESM1_ESM.pdf]

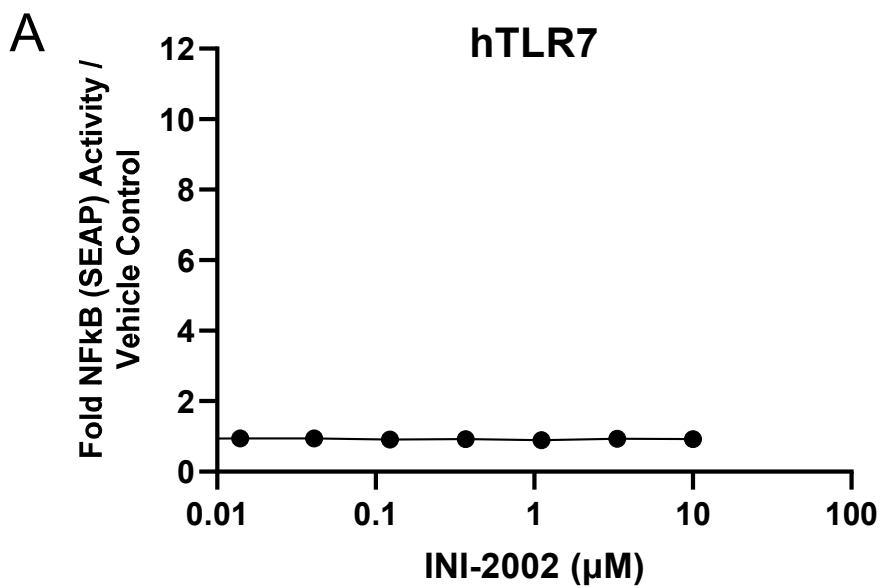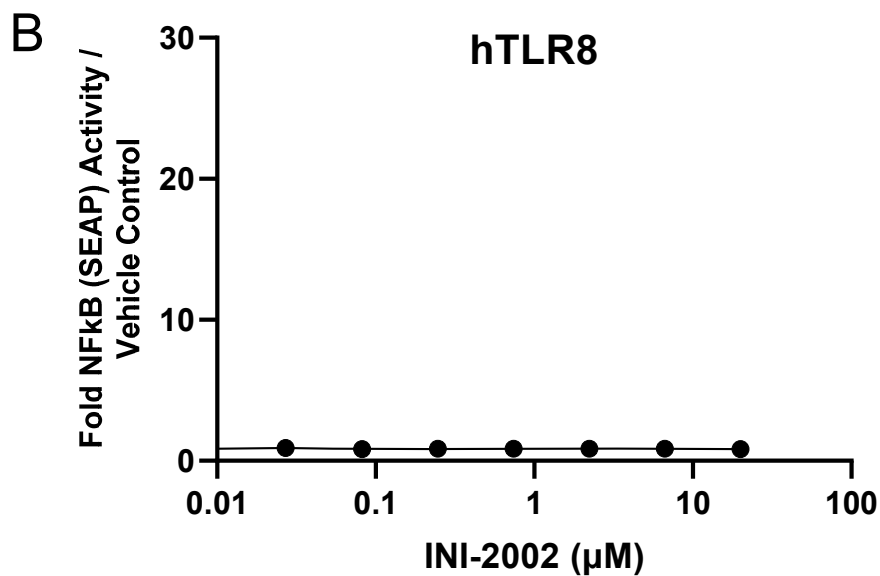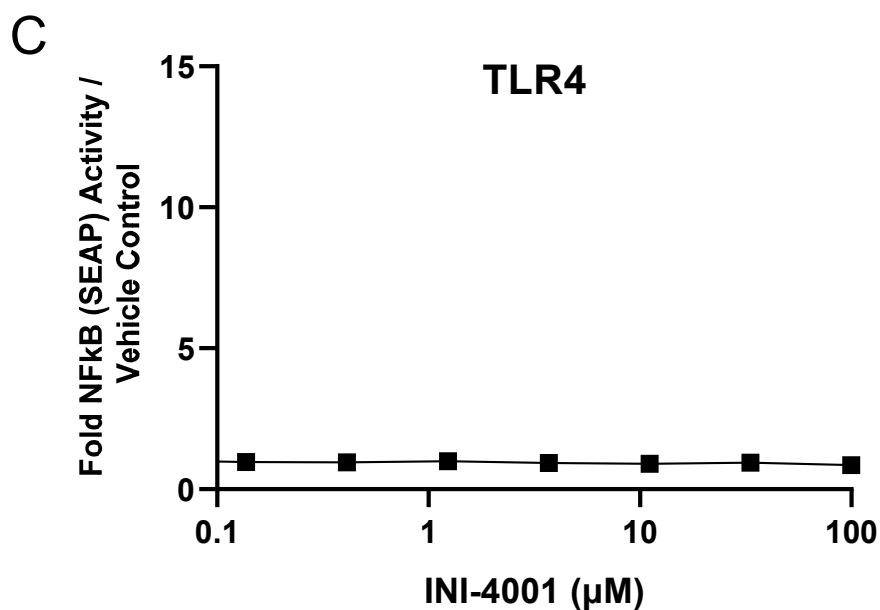

**Supplementary Figure 1: Activation of NF- $\kappa$ B in HEK cells** A) stimulation of HEK cells expressing TLR7 with INI-2002, B) stimulation of HEK cells expressing TLR8 with INI-2002, and C) stimulation of HEK cells expressing TLR4 with INI-4001. Data are shown as mean  $\pm$  SEM.

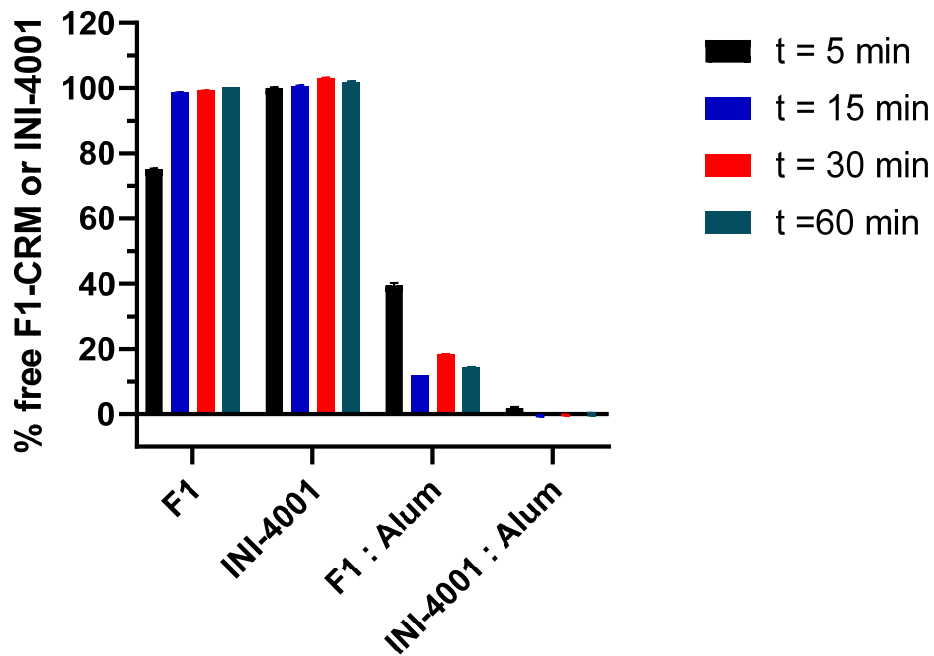

**Supplementary Figure 2: F1-CRM and INI-4001 are fully adsorbed to alum after 5 minutes of incubation.** F1-CRM, INI-4001 and alum were mixed using mouse in vivo study doses (5  $\mu\text{g}$  F<sub>1</sub>-CRM, 10  $\mu\text{g}$  INI-4001, 22.5  $\mu\text{g}$  Alhydrogel® aluminum hydroxide (InvivoGen) in 2% glycerin in water for irrigation (WFI)). At 5, 15, 30 and 60 minutes, a sample was centrifuged at 14000 rcf for 5 minutes and the amount of free F<sub>1</sub>-CRM and INI-4001 in the supernatant was measured. Data are shown as mean +/- SEM.

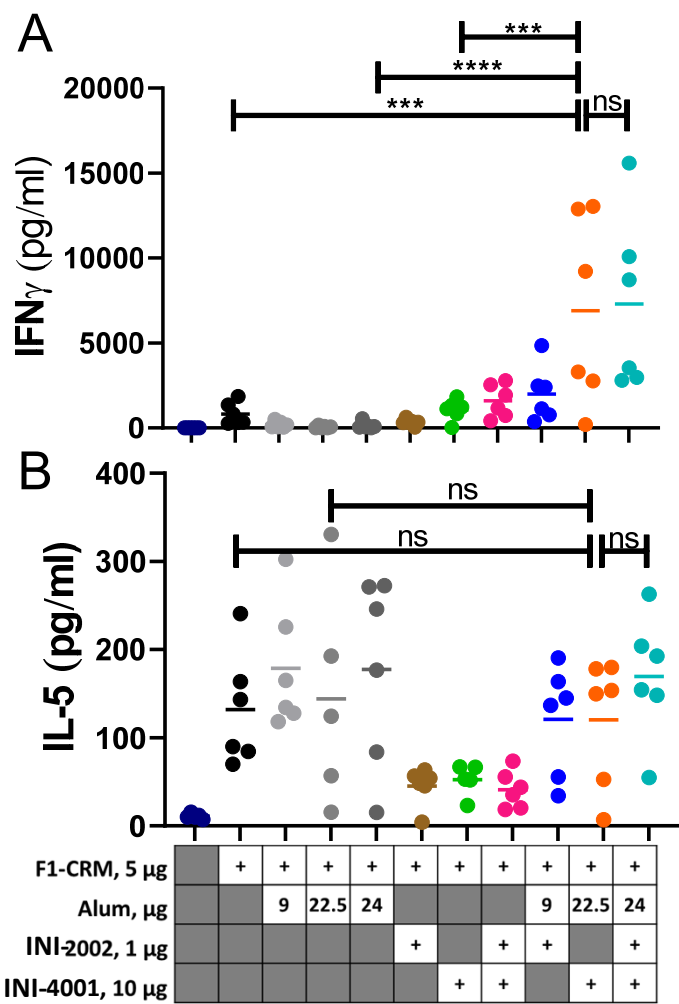

**Supplementary Figure 3: CRM-specific T cell responses support F<sub>1</sub>-specific antibody responses and class switching.** Mice were vaccinated twice, IM, with 5  $\mu$ g F<sub>1</sub>-CRM plus 9, 22.5, or 24  $\mu$ g alum, 1  $\mu$ g INI-2002, 10  $\mu$ g INI-4001, the combination of INI-2002 + INI-4001, INI-2002 + alum, INI-4001 + alum, or INI-2002 + INI-4001+ alum as indicated. 14 days after the second vaccination, spleens were harvested and disaggregated. Splenocytes were restimulated for 72 hours with 1  $\mu$ g/mL CRM at which point supernatants were harvested and analyzed for IFN $\gamma$  and IL-5 using a custom U-PLEX MSD assay. Statistical analysis conducted by one-way ANOVA with Fisher's LSD for multiple comparisons (GraphPad Prism) where \* =  $p \leq 0.05$ , \*\* =  $p \leq 0.01$ , \*\*\* =  $p \leq 0.001$ , \*\*\*\* =  $p \leq 0.0001$ .

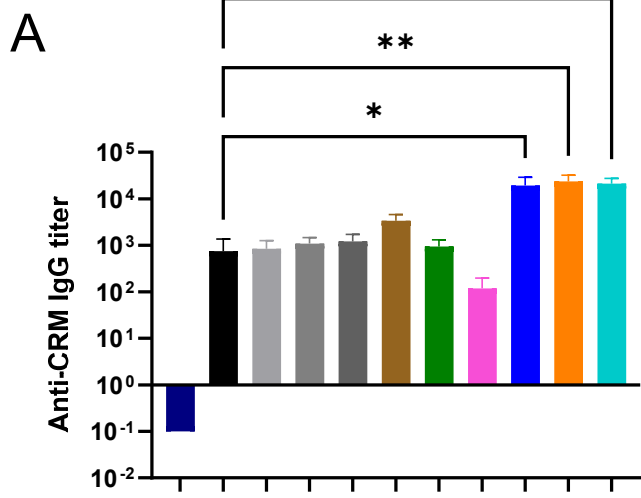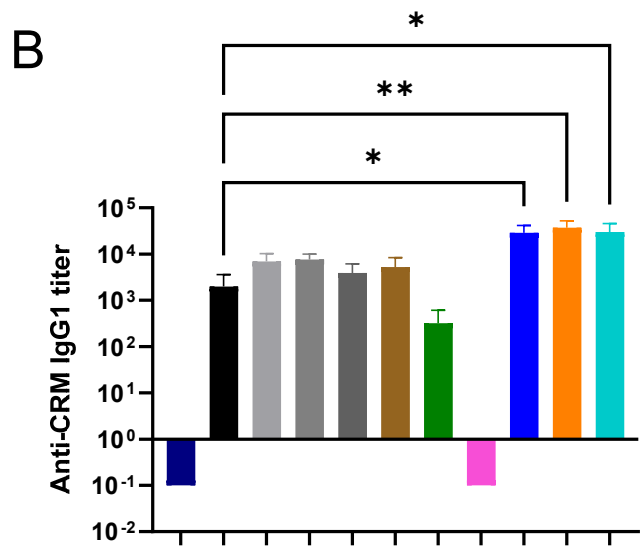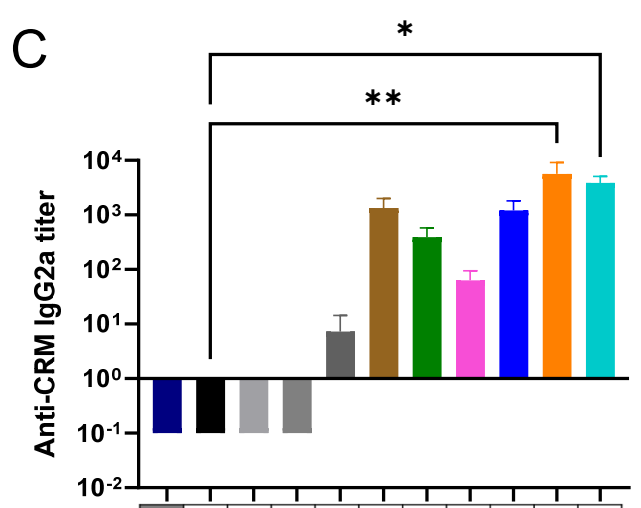

**Supplementary Figure 4: Alum, INI-2002, and INI-4001 adjuvants affect CRM-specific antibody responses similarly to F1-specific antibody responses.** Mice were vaccinated twice, IM, with 5  $\mu$ g F1-CRM plus 9, 22.5, or 24  $\mu$ g alum, 1  $\mu$ g INI-2002, 10  $\mu$ g INI-4001, the combination of INI-2002 + INI-4001, INI-2002 + alum, INI-4001 + alum, or INI-2002 + INI-4001 + alum as indicated. 14 days after the second vaccination, blood was collected and anti-F1 IgG (A), IgG1 (B), and IgG2a (C) antibody concentrations were measured by ELISA. Statistical analysis conducted by one-way ANOVA with Fisher's LSD for multiple comparisons (GraphPad Prism). \* =  $p \leq 0.05$ , \*\* =  $p \leq 0.01$ , \*\*\* =  $p \leq 0.001$ , \*\*\*\* =  $p \leq 0.0001$ ; color of asterisks indicates comparison group. Data are shown as mean  $\pm$  SEM.

|                      |  |   |   |      |    |   |   |   |   |      |    |
|----------------------|--|---|---|------|----|---|---|---|---|------|----|
| F1-CRM, 5 $\mu$ g    |  | + | + | +    | +  | + | + | + | + | +    | +  |
| Alum, $\mu$ g        |  |   | 9 | 22.5 | 24 |   |   |   | 9 | 22.5 | 24 |
| INI-2002, 1 $\mu$ g  |  |   |   |      |    | + |   |   | + | +    |    |
| INI-4001, 10 $\mu$ g |  |   |   |      |    |   | + | + |   |      | +  |

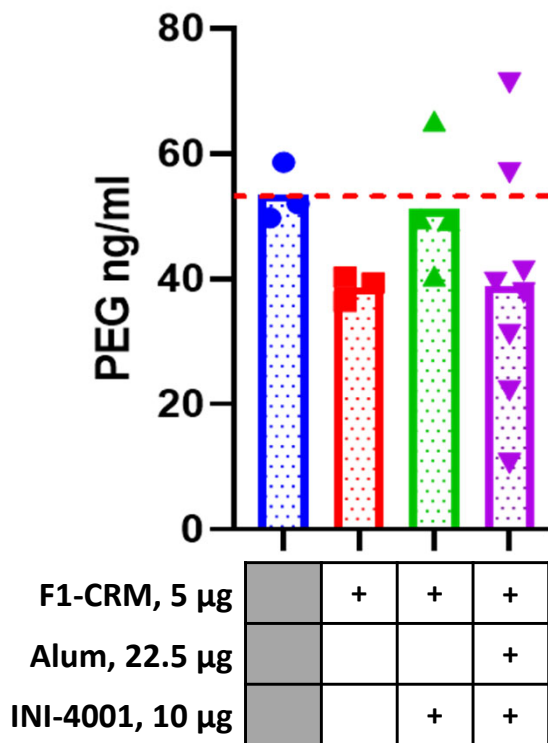

**Supplementary Figure 5: PEG-specific antibodies do not increase after vaccination of F<sub>1</sub>-CRM+INI-4001, a PEGylated compound.** Mouse serum samples from Fig. 3 were used in a PEG competitive ELISA. Decreased detection of PEG in vaccinated mice compared to unvaccinated mice indicates the presence of PEG-specific antibodies. Individual data points are shown along with bars representing the mean.

Fig S4 octet raw data

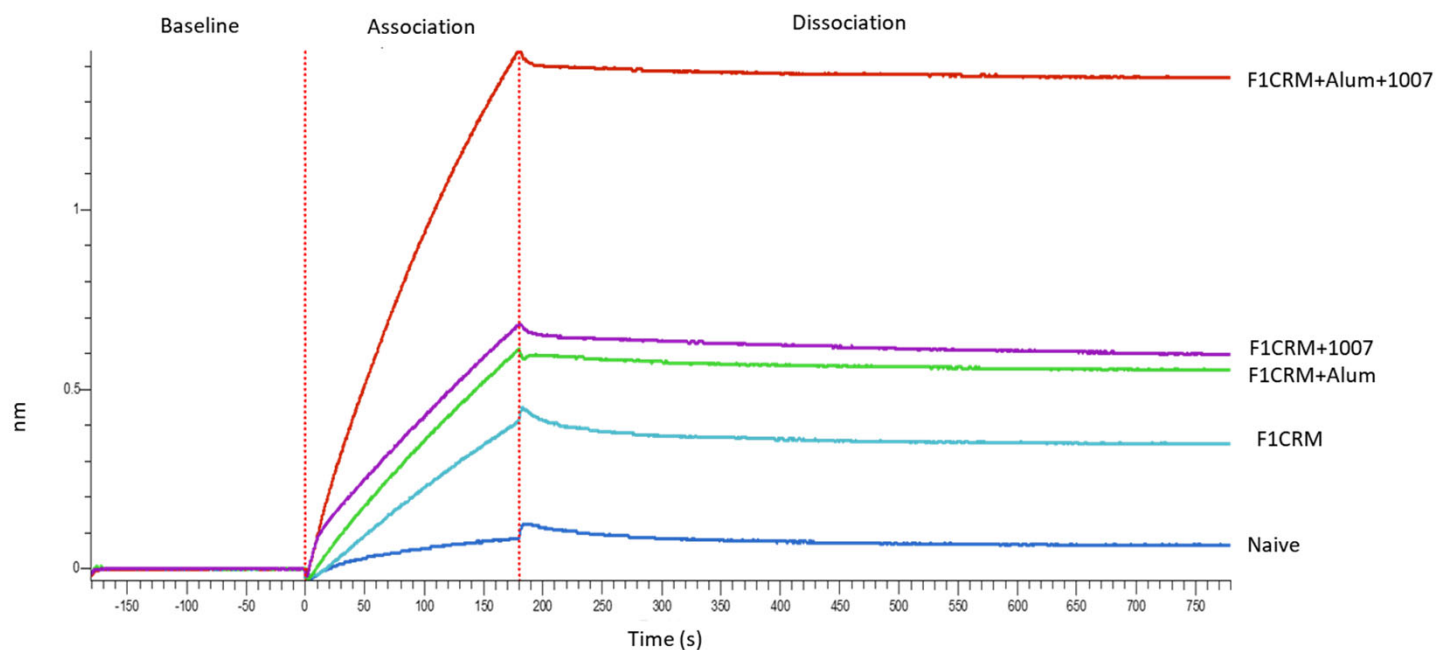

**Supplementary Figure 6. Representative Octet sensorgram of polyclonal anti-fentanyl antibody responses.** The sensorgram shows the interaction of polyclonal serum (analyte) and biotinylated F<sub>1</sub> antigen (ligand) loaded on the sensor tip during association and dissociation steps. Representative sensorgrams are shown for one sample from the indicated vaccination groups.

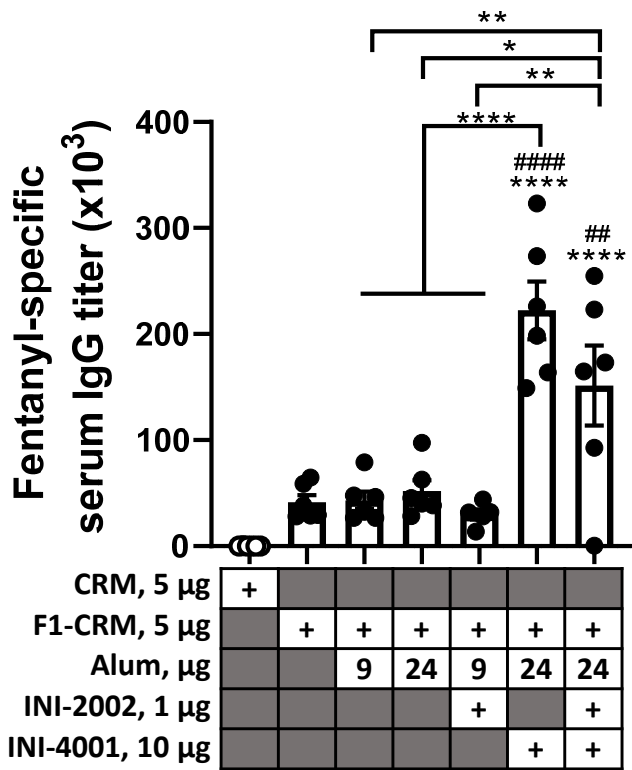

**Supplementary Figure 7: Pre-fentanyl challenge antibody titers after 3 vaccinations follow the same trends as after 2 vaccinations.** Mice were immunized, IM, on days 0, 14, and 28. On day 34, prior to fentanyl challenge, mice were bled and F<sub>1</sub>-specific antibody titers were determined in serum using 1/dilution factor at the midpoint of the serum dilution curve. Statistical analysis conducted by one-way ANOVA with Tukey's multiple comparisons post hoc test. Symbols: \* p ≤ 0.05, \*\* or ## p ≤ 0.01, \*\*\* p ≤ 0.001, \*\*\*\* or ##### p ≤ 0.0001 compared to control (\*) or F<sub>1</sub>-CRM (#). Individual data points are shown along with bars representing the mean and error bars representing SEM.
